# Supplementary material for: Durability of Protection Against Symptomatic COVID-19 Among Participants of the mRNA-1273 SARS-CoV-2 Vaccine Trial
Source: PubMed Central journal article supplement (PMC9178430; doi:10.1001/jamanetworkopen.2022.15984), 2022-06-08
Supplement: jamanetwopen-e2215984-s002.pdf [file jamanetwopen-e2215984-s002.pdf]

\*First name, last name, and suffix (if applicable) are required and will appear in PubMed.

| <b>*Group Name(s): The COVE Study Group</b> |                   |                              |                  |                                        |                                          |                                                         |                                                                                            |
|---------------------------------------------|-------------------|------------------------------|------------------|----------------------------------------|------------------------------------------|---------------------------------------------------------|--------------------------------------------------------------------------------------------|
| <b>*First Name and Middle Initial(s)</b>    | <b>*Last Name</b> | <b>*Suffix (eg, Jr, III)</b> | Academic Degrees | Institution                            | Location (city, state/province, country) | Role or Contribution, eg, chair, principal investigator | Group (if more than 1 Group listed in the byline) and/or Subgroup (eg, Steering Committee) |
| Moni B                                      | Neradilek         |                              | MS               | Fred Hutchinson Cancer Research        | Seattle, WA, USA                         | Data analysis                                           |                                                                                            |
| Holly                                       | Janes             |                              | PhD              | Fred Hutchinson Cancer Research Center | Seattle, WA, USA                         | Conception of study, Data analysis                      |                                                                                            |
| Weiping                                     | Deng              |                              | PhD              | Moderna                                | Cambridge, MA, USA                       | Study conduct                                           |                                                                                            |
| Honghong                                    | Zhou              |                              | PhD              | Moderna                                | Cambridge, MA, USA                       | Study conduct                                           |                                                                                            |
